# Supplementary material for: Production of singlet oxygen by the reaction of non-basic hydrogen peroxide with chlorine gas
Source: Royal Society of Chemistry journal article supplement (doi:10.1039/c2cp41690e), 2012-01-01
Supplement: c2cp41690e.pdf [file c2cp41690e.pdf]

## Supplementary Information for

### Production of Singlet Oxygen by the Reaction of Non-Basic Hydrogen Peroxide with Chlorine Gas

Wenming Tian, Wenbo Shi, Heping Yang, Rongrong Cui, and Liezheng Deng\*

*State Key Laboratory of Molecular Reaction Dynamics, Dalian Institute of Chemical Physics, Chinese Academy of Sciences, 457 Zhongshan Road Dalian, 116023 Liaoning, P. R. China*

\* Corresponding author. Tel: +86 411 84379010. Fax: +86 411 84675584. E-mail address: dlz@dicp.ac.cn

#### CONTENTS

|                                                                                                                |     |
|----------------------------------------------------------------------------------------------------------------|-----|
| Measurement of the yield of O <sub>2</sub> ( <sup>1</sup> Δ) by spontaneous Raman scattering method            | S2  |
| Methods for estimating [HO <sub>2</sub> <sup>-</sup> ] and PH Value in H <sub>2</sub> O <sub>2</sub> solutions | S4  |
| Figure S1. Interference of Cl <sub>2</sub> fluorescence with SRS spectrum in nBHP-2 experiment                 | S8  |
| Figure S2. Interference of Cl <sub>2</sub> fluorescence with SRS spectrum in nBHP-3 experiment                 | S8  |
| Figure S3. Interference of Cl <sub>2</sub> fluorescence with SRS spectrum in nBHP-4 experiment                 | S9  |
| Figure S4. Cl <sub>2</sub> fluorescence-eliminated SRS spectrum in nBHP-4 experiment                           | S9  |
| Gaussian Calculations                                                                                          | S10 |
| References                                                                                                     | S11 |

## Measurement of the Yield of O<sub>2</sub>(<sup>1</sup>Δ) by spontaneous Raman scattering method

The yield of O<sub>2</sub>(<sup>1</sup>Δ), Y<sub>Δ</sub>, is defined as the fraction of O<sub>2</sub>(<sup>1</sup>Δ) in total O<sub>2</sub> gas,

$$Y_{\Delta} = \frac{[\text{O}_2(^1\Delta)]}{[\text{O}_2(^1\Delta)] + [\text{O}_2(^3\Sigma)]} \quad (1)$$

where [O<sub>2</sub>(<sup>1</sup>Δ)] and [O<sub>2</sub>(<sup>3</sup>Σ)] denote the concentration of singlet oxygen and ground state oxygen respectively. In 1998, Gyls *et al.*<sup>1,2</sup> developed a spontaneous Raman scattering (SRS) method for the measurement of the yield of O<sub>2</sub>(<sup>1</sup>Δ). The principle is as follows. When an O<sub>2</sub>(<sup>1</sup>Δ) gas flow is excited by a laser beam, the produced SRS intensities of O<sub>2</sub>(<sup>1</sup>Δ) and O<sub>2</sub>(<sup>3</sup>Σ), I<sub>RΔ</sub> and I<sub>RΣ</sub>, can be expressed as

$$\begin{aligned} I_{R\Delta} &= \sigma_{\Delta} \cdot [\text{O}_2(^1\Delta)] \cdot I \\ I_{R\Sigma} &= \sigma_{\Sigma} \cdot [\text{O}_2(^3\Sigma)] \cdot I \end{aligned} \quad (2)$$

where σ<sub>Δ</sub> and σ<sub>Σ</sub> denote the Raman cross-section of O<sub>2</sub>(<sup>1</sup>Δ) and O<sub>2</sub>(<sup>3</sup>Σ) respectively (the subscript Δ and Σ hereinafter are referred to O<sub>2</sub>(<sup>1</sup>Δ) and O<sub>2</sub>(<sup>3</sup>Σ) respectively), and I is the laser intensity. According to Eqs.(1)-(2), the final formula used to calculate the yield of O<sub>2</sub>(<sup>1</sup>Δ) can be written as

$$Y_{\Delta} = \frac{I_{R\Delta}}{I_{R\Delta} + (\sigma_{\Delta}/\sigma_{\Sigma})I_{R\Sigma}} = \frac{I_{R\Delta}}{I_{R\Delta} + \theta \cdot I_{R\Sigma}} \quad (3)$$

where the Raman cross-sectional ratio θ=σ<sub>Δ</sub>/σ<sub>Σ</sub>, and has been measured to be 0.45–0.03 at 527 nm (frequency-doubled YLF laser),<sup>2</sup> and is expected to be close to that at 532 nm (frequency-doubled YAG laser) because of the closeness of the wavelengths.

Obviously, according to Eq.(3) the relative error of Y<sub>Δ</sub> can be expressed as

$$\left| \frac{dY_{\Delta}}{Y_{\Delta}} \right| = (1 - Y_{\Delta}) \cdot \left[ \left| \frac{d\theta}{\theta} \right| + \left| \frac{dI_{R\Delta}}{I_{R\Delta}} \right| + \left| \frac{dI_{R\Sigma}}{I_{R\Sigma}} \right| \right] \quad (4)$$

In practice, the I<sub>RΔ</sub> and I<sub>RΣ</sub> in Eq.(3) were replaced respectively by the peak areas of O<sub>2</sub>(<sup>1</sup>Δ) and O<sub>2</sub>(<sup>3</sup>Σ) in a SRS spectrum, and the  $\left| \frac{dI_{R\Delta}}{I_{R\Delta}} \right|$  and  $\left| \frac{dI_{R\Sigma}}{I_{R\Sigma}} \right|$ , the relative errors of I<sub>RΔ</sub> and I<sub>RΣ</sub> in Eq.(4) were replaced respectively by the reciprocals of the signal-to-noise

ratios of  $O_2(^1\Delta)$  and  $O_2(^3\Sigma)$  in a SRS spectrum.

However, as shown in Figures S1-S3, the SRS of  $O_2(^1\Delta)$  and  $O_2(^3\Sigma)$  is often interfered with the fluorescence of residual  $Cl_2$  resulted from the incomplete reaction of  $Cl_2$  with  $H_2O_2$ , and the yield of  $O_2(^1\Delta)$  can not directly be calculated out by Eq.(3). The method for eliminating fluorescence interference from SRS spectrum has been proposed by Wolga<sup>3</sup> in 1978 and is as follows. A polarizer is inserted between the sample and the spectrograph. When the polarization directions of the laser and the polarizer are parallel (//) to each other, the total light intensity detected,  $I_{t//}$ , is

$$I_{t//} = I_{R//} + I_{F//} \quad (5a)$$

and when perpendicular (^), the total light intensity detected becomes  $I_{t\perp}$  (note that the acquisition times for  $I_{t//}$  and  $I_{t\perp}$  are strictly equal),

$$I_{t\perp} = I_{R\perp} + I_{F\perp} \quad (5b)$$

In Eq.(5),  $I_R$  and  $I_F$  are the intensity of SRS and fluorescence respectively. Given the fact that Raman radiation is always strongly polarized while fluorescence is essentially non-polarized and  $I_{F//} = I_{F\perp}$  in a gaseous medium, the fluorescence will be eliminated from the SRS spectrum and Eq.(6) be obtained when Eq.(5a) is subtracted by Eq.(5b).

$$I_{t//} - I_{t\perp} = I_{R//} - I_{R\perp} \quad (6)$$

Basing on the above Wolga's method,<sup>3</sup> we further suggested<sup>4</sup> that the total intensity of Raman scattering,  $I_R$ , be expressed as

$$I_R = I_{R//} + I_{R\perp} = \frac{(1+\rho)}{(1-\rho)}(I_{t//} - I_{t\perp}) \quad (7)$$

where  $\rho = I_{R\perp}/I_{R//}$ , is depolarization ratio, and Eq.(3) is then changed as follows

$$Y_{\Delta} = \frac{(I_{t//} - I_{t\perp})_{\Delta}}{(I_{t//} - I_{t\perp})_{\Delta} + \theta' \cdot (I_{t//} - I_{t\perp})_{\Sigma}} \quad (8)$$

$$\theta' = \frac{1+\rho_{\Sigma}}{1-\rho_{\Sigma}} \left( \frac{1+\rho_{\Delta}}{1-\rho_{\Delta}} \right)^{-1} \cdot \theta$$

In Eq.(7) the values of  $\rho_{\Sigma}$  and  $\rho_{\Delta}$  have been estimated by us<sup>4</sup> to be  $\rho_{\Sigma}=0.067$  and  $\rho_{\Delta}=0.05$ , and then  $\theta' = 0.47$ , very close to the value of  $\theta$  (0.45) used in Eqs.(3-4). Therefore, Eqs.(3-4) still hold for the fluorescence-eliminated SRS spectrum except that the  $I_R$  term is needed to be substituted by the  $(I_{\parallel} - I_{\perp})$ .

In BHP (KO<sub>2</sub>H) and nBHP-1 (C<sub>5</sub>H<sub>5</sub>N) experiments in which the fluorescence of residual Cl<sub>2</sub> had not yet obviously interfere with the SRS spectrum of O<sub>2</sub>(<sup>1</sup>Δ) and O<sub>2</sub>(<sup>3</sup>Σ) (see A and B in Figure 1), the yield of O<sub>2</sub>(<sup>1</sup>Δ) and its relative error were directly calculated out by Eqs.(3-4). While in nBHP-2 (CH<sub>3</sub>COONH<sub>4</sub>), nBHP-3 (HCOONH<sub>4</sub>) and nBHP-4 (NH<sub>4</sub>F) experiments in which the SRS spectrum of O<sub>2</sub>(<sup>1</sup>Δ) and O<sub>2</sub>(<sup>3</sup>Σ) had been overwhelmed by the fluorescence of residual Cl<sub>2</sub> (see Figures S1-S3),  $(I_{\parallel} - I_{\perp})$ , the fluorescence-eliminated SRS intensity is first obtained and then Eqs.(3-4) are applied.

However, it should be pointed out that even with the use of Wolga's method, the SRS spectrum for nBHP-4 could not anyway be separated from the Cl<sub>2</sub> fluorescence background (see Figure S3-S4) due to the low Cl<sub>2</sub>+(nBHP-4) reaction efficiency, hence the yield of O<sub>2</sub>(<sup>1</sup>Δ) was unable to be measured in the case of nBHP-4.

### Methods for estimating [HO<sub>2</sub><sup>-</sup>] and PH Value in H<sub>2</sub>O<sub>2</sub> Solutions

In this section, all the dissociation constants of acids are cited from Ref. [5].

**Basic Hydrogen Peroxide (BHP) Solution.** The acid-base equilibriums are

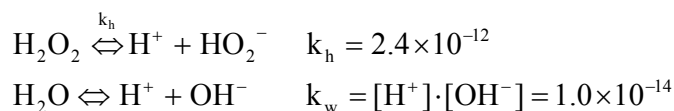

The equation of charge conservation may be written as

$$[\text{H}^+] + [\text{K}^+] = [\text{HO}_2^-] + \text{OH}^- \quad (9.1)$$

The [K<sup>+</sup>] should equal C<sub>KO<sub>2</sub>H</sub>, the initial concentration of KO<sub>2</sub>H (6.6M here).

$$[\text{K}^+] = C_{\text{KO}_2\text{H}} \quad (9.2)$$

$[\text{HO}_2^-]$  can be expressed as

$$[\text{HO}_2^-] = \alpha_{\text{HO}_2^-} \times (C_{\text{H}_2\text{O}_2} + C_{\text{KO}_2\text{H}}) \quad (9.3)$$

where  $C_{\text{H}_2\text{O}_2}$  is the initial concentration of  $\text{H}_2\text{O}_2$  (2.4M here),  $(C_{\text{H}_2\text{O}_2} + C_{\text{KO}_2\text{H}})$  represents the apparent concentration of  $\text{H}_2\text{O}_2$ , i.e. the total concentration of  $\text{H}_2\text{O}_2$  in all forms, and  $\alpha_{\text{HO}_2^-}$  is the fraction of  $\text{HO}_2^-$  in total  $\text{H}_2\text{O}_2$ , and can be expressed as

$$\alpha_{\text{HO}_2^-} = \frac{[\text{HO}_2^-]}{C_{\text{H}_2\text{O}_2} + C_{\text{KO}_2\text{H}}} = \frac{k_h}{k_h + [\text{H}^+]} \quad (9.4)$$

The water ionic product is a constant ( $1.0 \times 10^{-14}$  at 25°C) as

$$[\text{H}^+] \cdot [\text{OH}^-] = k_w \quad (9.5)$$

$[\text{H}^+]$ ,  $[\text{K}^+]$ ,  $\alpha_{\text{HO}_2^-}$ ,  $[\text{HO}_2^-]$ , and  $[\text{OH}^-]$  can be solved out from Eqs.(9.1-9.5), and then the PH value,  $-\log([\text{H}^+])$ , can be obtained.

**C<sub>5</sub>H<sub>5</sub>N - Dissolved Hydrogen Peroxide Solution.** The acid-base equilibriums are

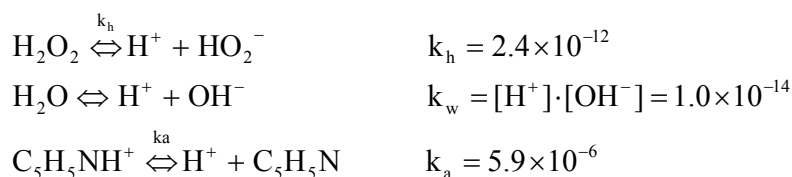

The proton balance equation can be written as

$$[\text{H}^+] + [\text{C}_5\text{H}_5\text{NH}^+] = [\text{HO}_2^-] + \text{OH}^- \quad (10.1)$$

And it is evident that

$$[\text{C}_5\text{H}_5\text{NH}^+] = \alpha_{\text{C}_5\text{H}_5\text{NH}^+} \times C_{\text{C}_5\text{H}_5\text{N}} \quad (10.2)$$

$$\alpha_{\text{C}_5\text{H}_5\text{NH}^+} = \frac{[\text{C}_5\text{H}_5\text{NH}^+]}{C_{\text{C}_5\text{H}_5\text{N}}} = \frac{[\text{H}^+]}{k_a + [\text{H}^+]} \quad (10.3)$$

$$[\text{HO}_2^-] = \alpha_{\text{HO}_2^-} \times C_{\text{H}_2\text{O}_2} \quad (10.4)$$

$$\alpha_{\text{HO}_2^-} = \frac{[\text{HO}_2^-]}{C_{\text{H}_2\text{O}_2}} = \frac{k_h}{k_h + [\text{H}^+]} \quad (10.5)$$

$$[\text{H}^+] \cdot [\text{OH}^-] = k_w \quad (10.6)$$

In Eqs.(10.1-10.6),  $\alpha_{\text{C}_5\text{H}_5\text{NH}^+}$  is the fraction of  $\text{C}_5\text{H}_5\text{NH}^+$  in total  $\text{C}_5\text{H}_5\text{N}$ ,  $C_{\text{C}_5\text{H}_5\text{N}}$  and  $C_{\text{H}_2\text{O}_2}$  are the initial concentrations of  $\text{C}_5\text{H}_5\text{N}$  and  $\text{H}_2\text{O}_2$  respectively, and are both 9.0M here.  $[\text{H}^+]$ ,  $[\text{C}_5\text{H}_5\text{NH}^+]$ ,  $[\text{HO}_2^-]$ ,  $[\text{OH}^-]$ ,  $\alpha_{\text{C}_5\text{H}_5\text{NH}^+}$  and  $\alpha_{\text{HO}_2^-}$  can be solved out from Eqs.(10.1-10.6), and then the PH value,  $-\log([\text{H}^+])$ , can be obtained.

### **CH<sub>3</sub>COONH<sub>4</sub>, H<sub>3</sub>COONH<sub>4</sub>, and NH<sub>4</sub>F Dissolved Hydrogen Peroxide Solutions.**

The acid-base equilibriums for these solutions are

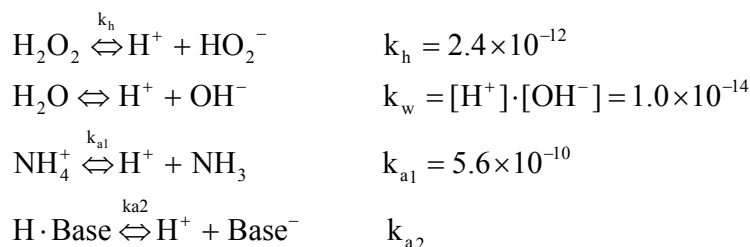

where  $\text{Base}^-$  represents  $\text{CH}_3\text{COO}^-$ ,  $\text{HCOO}^-$  or  $\text{F}^-$ , and  $k_{a2}$  equals  $1.75 \times 10^{-5}$  ( $\text{CH}_3\text{COOH}$ ),  $1.8 \times 10^{-4}$  ( $\text{HCOOH}$ ) or  $6.3 \times 10^{-4}$  ( $\text{HF}$ ).

The proton balance equation may be written as

$$[\text{H}^+] + [\text{H} \cdot \text{Base}] = [\text{NH}_3] + [\text{HO}_2^-] + \text{OH}^- \quad (11.1)$$

And it is evident that

$$[\text{H} \cdot \text{Base}] = \alpha_{\text{H} \cdot \text{Base}} \times C_s \quad (11.2)$$

$$\alpha_{\text{H} \cdot \text{Base}} = \frac{[\text{H} \cdot \text{Base}]}{C_s} = \frac{[\text{H}^+]}{k_{a2} + [\text{H}^+]} \quad (11.3)$$

$$[\text{NH}_3] = \alpha_{\text{NH}_3} \times C_s \quad (11.4)$$

$$\alpha_{\text{NH}_3} = \frac{[\text{NH}_3]}{C_s} = \frac{k_{a1}}{k_{a1} + [\text{H}^+]} \quad (11.5)$$

$$[\text{HO}_2^-] = \alpha_{\text{HO}_2^-} \times C_{\text{H}_2\text{O}_2} \quad (11.6)$$

$$\alpha_{\text{HO}_2^-} = \frac{[\text{HO}_2^-]}{C_{\text{H}_2\text{O}_2}} = \frac{k_h}{k_h + [\text{H}^+]} \quad (11.7)$$

$$[\text{H}^+] \cdot [\text{OH}^-] = k_w \quad (11.8)$$

In Eqs.(11.1-11.8),  $\alpha_{\text{H-Base}}$  is the fraction of  $\text{H-Base}^-$  in total  $\text{Base}^-$ ,  $C_S$  is the initial concentration of the salt  $\text{CH}_3\text{COONH}_4$ ,  $\text{H}_3\text{COONH}_4$ , or  $\text{NH}_4\text{F}$  (9.0M here).  $[\text{H}^+]$ ,  $[\text{H} \cdot \text{Base}]$ ,  $[\text{NH}_3]$ ,  $[\text{HO}_2^-]$ ,  $[\text{OH}^-]$ ,  $\alpha_{\text{H-Base}}$ ,  $\alpha_{\text{NH}_3}$  and  $\alpha_{\text{HO}_2^-}$  can be solved out from Eqs.(11.1-11.8), and then the PH value,  $-\log([\text{H}^+])$ , can be obtained.

**$\text{H}_2\text{O}_2 - \text{H}_2\text{O}$  System.** The  $\text{H}_2\text{O}_2 - \text{H}_2\text{O}$  system consists of  $\text{H}_2\text{O}_2$  and  $\text{H}_2\text{O}$  only, and the acid-base equilibriums are

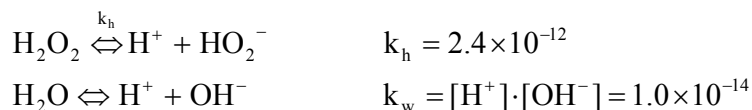

And evidently,

$$[\text{H}^+] = [\text{HO}_2^-] + [\text{OH}^-] \quad (\text{The proton balance equation}) \quad (12.1)$$

$$[\text{HO}_2^-] = \alpha_{\text{HO}_2^-} \times C_{\text{H}_2\text{O}_2} \quad (12.2)$$

$$\alpha_{\text{HO}_2^-} = \frac{[\text{HO}_2^-]}{C_{\text{H}_2\text{O}_2}} = \frac{k_h}{k_h + [\text{H}^+]} \quad (12.3)$$

$$[\text{H}^+] \cdot [\text{OH}^-] = k_w \quad (12.4)$$

From Eqs.(12.1-12.4),  $[\text{H}^+]$ ,  $[\text{HO}_2^-]$ ,  $[\text{OH}^-]$  and  $\alpha_{\text{HO}_2^-}$  can be solved out, and then the PH value,  $-\log([\text{H}^+])$ , can be obtained.

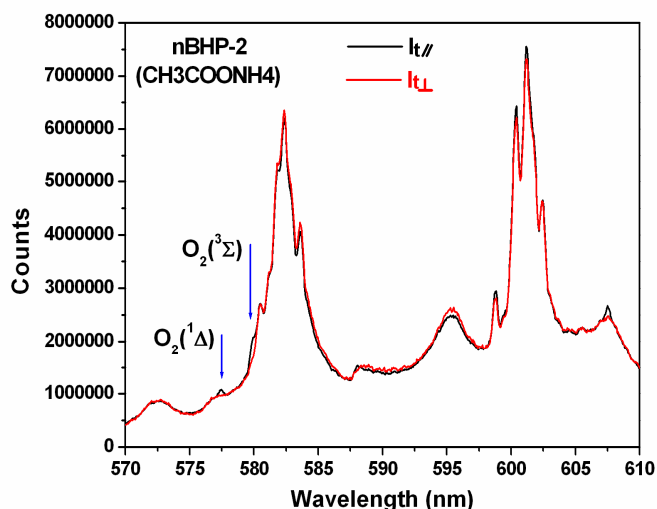

**Figure S1.** Interference of Cl<sub>2</sub> fluorescence with SRS spectrum in nBHP-2 experiment. Where  $I_{t//}$  and  $I_{t\perp}$  is the spectrum obtained when the polarization directions of the laser and the polarizer are parallel ( $//$ ) and perpendicular ( $\perp$ ) to each other respectively, and the expected peak positions of the Raman scattering of O<sub>2</sub>(<sup>1</sup>Δ) and O<sub>2</sub>(<sup>3</sup>Σ) are indicated by the arrows.

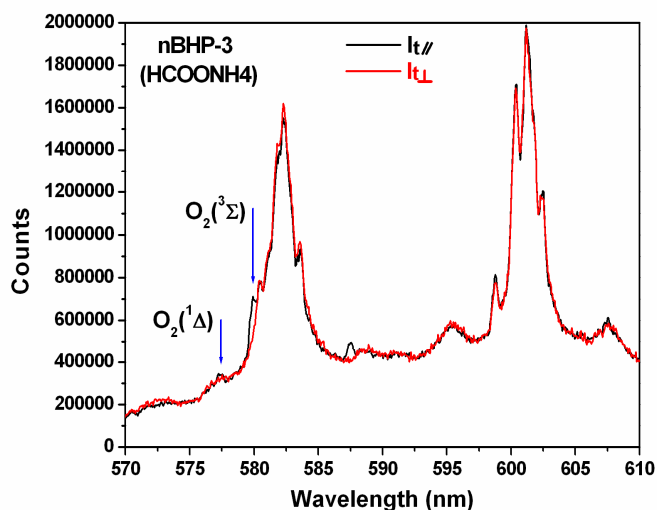

**Figure S2.** Interference of Cl<sub>2</sub> fluorescence with SRS spectrum in nBHP-3 experiment. Where  $I_{t//}$  and  $I_{t\perp}$  is the spectrum obtained when the polarization directions of the laser and the polarizer are parallel ( $//$ ) and perpendicular ( $\perp$ ) to each other respectively, and the expected peak positions of the Raman scattering of O<sub>2</sub>(<sup>1</sup>Δ) and O<sub>2</sub>(<sup>3</sup>Σ) are indicated by the arrows.



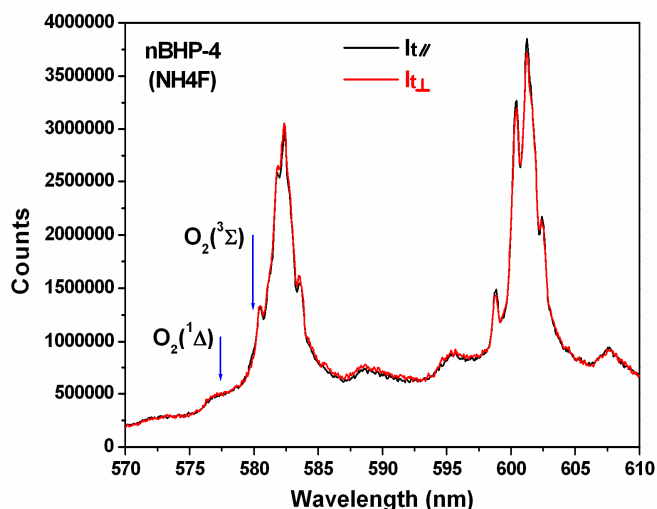

**Figure S3.** Interference of  $Cl_2$  fluorescence with SRS spectrum in nBHP-4 experiment. Where  $I_{\parallel}$  and  $I_{\perp}$  is the spectrum obtained when the polarization directions of the laser and the polarizer are parallel ( $\parallel$ ) and perpendicular ( $\perp$ ) to each other respectively, and the expected peak positions of the Raman scattering of  $O_2(^1\Delta)$  and  $O_2(^3\Sigma)$  are indicated by the arrows.

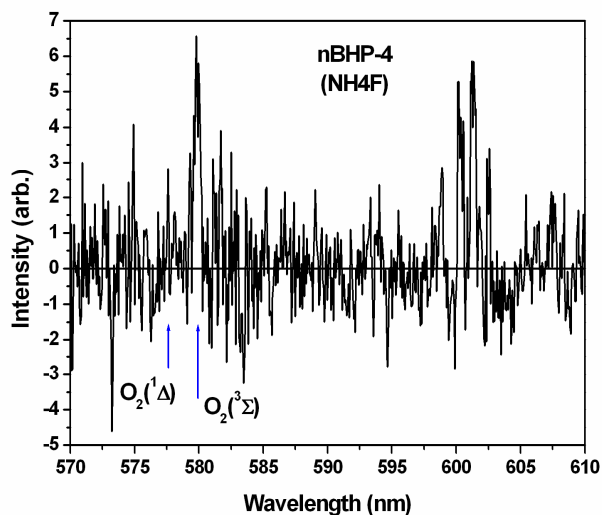

**Figure S4.**  $Cl_2$  fluorescence-eliminated SRS spectrum in nBHP-4 experiment, separated from Figure S4. Where the Raman scattering of  $O_2(^1\Delta)$  and  $O_2(^3\Sigma)$  is too weak to be distinguished out of the noise, and the expected peak positions of the Raman scattering of  $O_2(^1\Delta)$  and  $O_2(^3\Sigma)$  are indicated by the arrows.

## Gaussian Calculations

Gaussian calculations were performed by using Gaussian03 program.<sup>6</sup> The Route Section input parameter is “#opt freq b3lyp/6-31+g(d,p) scrf=(solvent=water) geom=connectivity”, and the Spin multiplicity is “1”. The input geometries for the calculated species are listed in Table 1S. The resulted optimized geometries and the charge distributions for HOOH, Cl-Cl, [HOOH...Cl-Cl] and [HOO<sup>-</sup>-Cl-Cl] are shown in Figure 4.

Table 1S. The input geometries and the energy results from the calculations

| Species                    | Input geometry                                                                                                                                                                                                                                                                   | Energy results (Hartree-Fork) |
|----------------------------|----------------------------------------------------------------------------------------------------------------------------------------------------------------------------------------------------------------------------------------------------------------------------------|-------------------------------|
| Cl <sub>2</sub>            | Cl B1 1.98000000<br>Cl 1 B1                                                                                                                                                                                                                                                      | -920.3543376                  |
| HOH                        | O B1 0.95840000<br>H 1 B1 B2 0.96000000<br>H 1 B2 2 A1 A1 104.45000000                                                                                                                                                                                                           | -76.4484363                   |
| HOOH                       | O B1 0.96000000 A2 100.00000000<br>H 1 B1 B2 1.48000000 D1 111.50000000<br>O 1 B2 2 A1 B3 0.96000000<br>H 3 B3 1 A2 2 D1 A1 100.00000000                                                                                                                                         | -151.579444                   |
| [HOH Cl- Cl]               | O B1 0.96000000 A2 110.11775945<br>H 1 B1 B2 0.96000000 A3 110.11775945<br>H 1 B2 2 A1 B3 1.65000000 D1 -120.45367159<br>Cl 1 B3 2 A2 3 D1 B4 3.63000000 D2 -120.45367159<br>Cl 1 B4 2 A3 3 D2 A1 109.50000006                                                                   | -996.8082014                  |
| [HOOH Cl- Cl]              | O B1 0.99505392 A2 101.14597691<br>H 1 B1 B2 1.45054355 A3 110.00880127<br>O 1 B2 2 A1 B3 0.99260790 A4 110.75285873<br>H 3 B3 1 A2 2 D1 B4 2.53531358 D1 111.02684643<br>Cl 1 B4 3 A3 4 D2 B5 4.62081074 D2 -138.43057729<br>Cl 1 B5 3 A4 4 D3 A1 101.83784163 D3 -138.21874323 | -1071.937958                  |
| [HOO <sup>-</sup> - Cl Cl] | O B1 1.46009246 A2 105.46689451<br>O 1 B1 B2 0.98662074 A3 105.46689451<br>H 2 B2 1 A1 B3 1.65000000 D1 121.55171848<br>Cl 1 B3 2 A2 3 D1 B4 3.63000000 D2 121.55171848<br>Cl 1 B4 2 A3 3 D2 A1 100.17403771                                                                     | -1071.5031257                 |

Based on the energy results listed in Table 1S, the interaction energy between H<sub>2</sub>O and Cl<sub>2</sub>,  $E_{\text{H}_2\text{O}-\text{Cl}_2}$ , and the interaction energy between H<sub>2</sub>O<sub>2</sub> and Cl<sub>2</sub>,  $E_{\text{H}_2\text{O}_2-\text{Cl}_2}$ , can be calculated out as follows.

$$E_{\text{H}_2\text{O}-\text{Cl}_2} = E_{\text{H}_2\text{O}} + E_{\text{Cl}_2} - E_{[\text{HOH}\cdots\text{Cl}-\text{Cl}]^*} = 3.4 \text{ kcal/mol}$$

$$E_{\text{H}_2\text{O}_2-\text{Cl}_2} = E_{\text{H}_2\text{O}_2} + E_{\text{Cl}_2} - E_{[\text{HOOH}\cdots\text{Cl}-\text{Cl}]^*} = 2.6 \text{ kcal/mol}$$

## References

- 1 V. T. Gyls, L. F. Rubin, *Appl. Opt.*, 1998, **37**, 1026.
- 2 L. F. Rubin, V. T. Gyls, *Opt. Lett.*, 1998, **22** 1347.
- 3 G. J. Wolga, *US Pat.*, 4 080 073, 1978.
- 4 R. Cui, W. Shi, L. Deng, H. Yang, G. Sha, C. Zhang, *Chin. J. Chem. Phys.*, 2012, **25**, 142. (in English)
- 5 D. D. Perrin, *Dissociation Constants of Inorganic Acids and Bases in Aqueous Solution*, Butterworths, London, 1969.
- 6 M. J. Frisch, G. W. Trucks, H. B. Schlegel, G. E. Scuseria, M. A. Robb, J. R. Cheeseman, J. A. Montgomery, Jr., T. Vreven, K. N. Kudin, J. C. Burant, J. M. Millam, S. S. Iyengar, J. Tomasi, V. Barone, B. Mennucci, M. Cossi, G. Scalmani, N. Rega, G. A. Petersson, H. Nakatsuji, M. Hada, M. Ehara, K. Toyota, R. Fukuda, J. Hasegawa, M. Ishida, T. Nakajima, Y. Honda, O. Kitao, H. Nakai, M. Klene, X. Li, J. E. Knox, H. P. Hratchian, J. B. Cross, C. Adamo, J. Jaramillo, R. Gomperts, R. E. Stratmann, O. Yazyev, A. J. Austin, R. Cammi, C. Pomelli, J. W. Ochterski, P. Y. Ayala, K. Morokuma, G. A. Voth, P. Salvador, J. J. Dannenberg, V. G. Zakrzewski, S. Dapprich, A. D. Daniels, M. C. Strain, O. Farkas, D. K. Malick, A. D. Rabuck, K. Raghavachari, J. B. Foresman, J. V. Ortiz, Q. Cui, A. G. Baboul, S. Clifford, J. Cioslowski, B. B. Stefanov, G. Liu, A. Liashenko, P. Piskorz, I. Komaromi, R. L. Martin, D. J. Fox, T. Keith, M. A. Al-Laham, C. Y. Peng, A. Nanayakkara, M. Challacombe, P. M. W. Gill, B. Johnson, W. Chen, M. W. Wong, C. Gonzalez, and J. A. Pople, *Gaussian 03, Version 6.0*, Gaussian, Inc., Pittsburgh PA, 2003.
